# Supplementary material for: A highly luminescent quantum dot/mesoporous TiO2 nanocomplex film under controlled energy transfer
Source: Royal Society of Chemistry journal article supplement (doi:10.1039/c9nr01044k), 2019-01-01
Supplement: c9nr01044k1.pdf [file c9nr01044k1.pdf]

## Supporting Information

### **Highly Luminescent Quantum Dots/Mesoporous TiO<sub>2</sub> Nanocomplex Film under Controlled Energy Transfer**

*Wonseok Choi, Dodam Kim, Hyunjin Cho, Moohyun Kim and Duk Young Jeon\**

*Address Department of Materials Science and Engineering, Korea Advanced Institute of  
Science and Technology, 291 Daehak-ro, Yuseong-gu, Daejeon 305-338, Republic of Korea.*

E-mail: [dyjeon@kaist.ac.kr](mailto:dyjeon@kaist.ac.kr)

### **Analysis of the amount of adsorbed QDs in mesoporous TiO<sub>2</sub> film**

In the Beer-Lambert equation,  $A$ ,  $\epsilon$ ,  $L$ , and  $C$  are the absorbance of QDs, the molar extinction coefficient of the material, the length of sample (film or cuvette, etc.), and the concentration of QDs, respectively. Here,  $\epsilon$  is defined as the slope of a plot of the absorption concentration of the material and concentration of the material with fixed size of cuvette. The molar extinction coefficient of CdZnS/ZnS QDs obtained by the above method was  $30.42 \text{ M}^{-1}\text{cm}^{-1}$  (Fig. S9 and S10, ESI†). Subsequently, the concentration of QD in each sample was estimated by substituting the absorbance and the thickness of each sample into the equation.

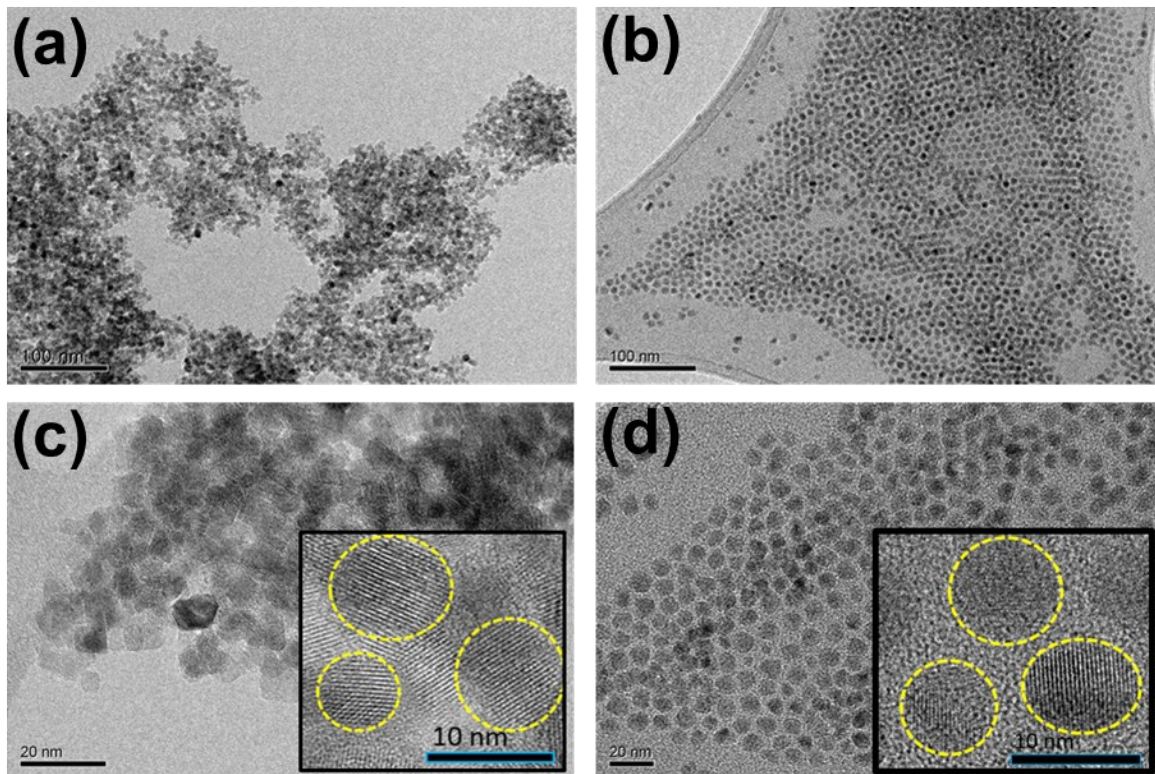

**Figure S1.** TEM images of TiO<sub>2</sub> nanoparticles (a, c) and CdZnS/ZnS QDs (b, d). Inset: TiO<sub>2</sub> nanoparticles and QDs with high magnification, respectively.

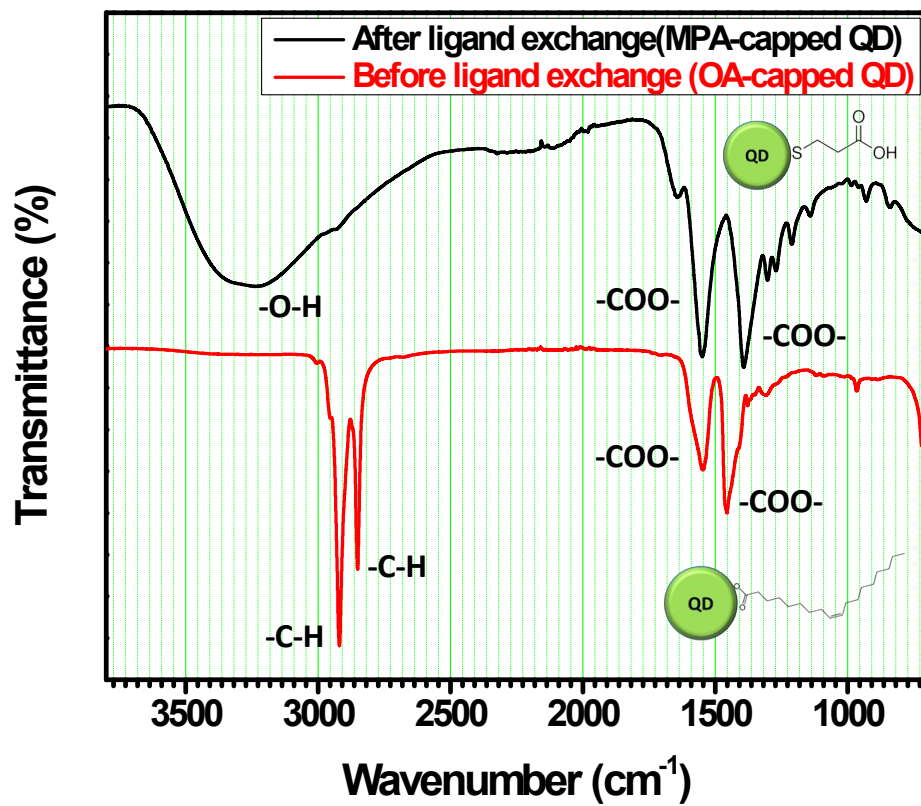

**Figure S2.** Attenuated total reflection (ATR) spectra before (OA-capped CdZnS/ZnS QD) and after (MPA-capped QD) ligand exchange.

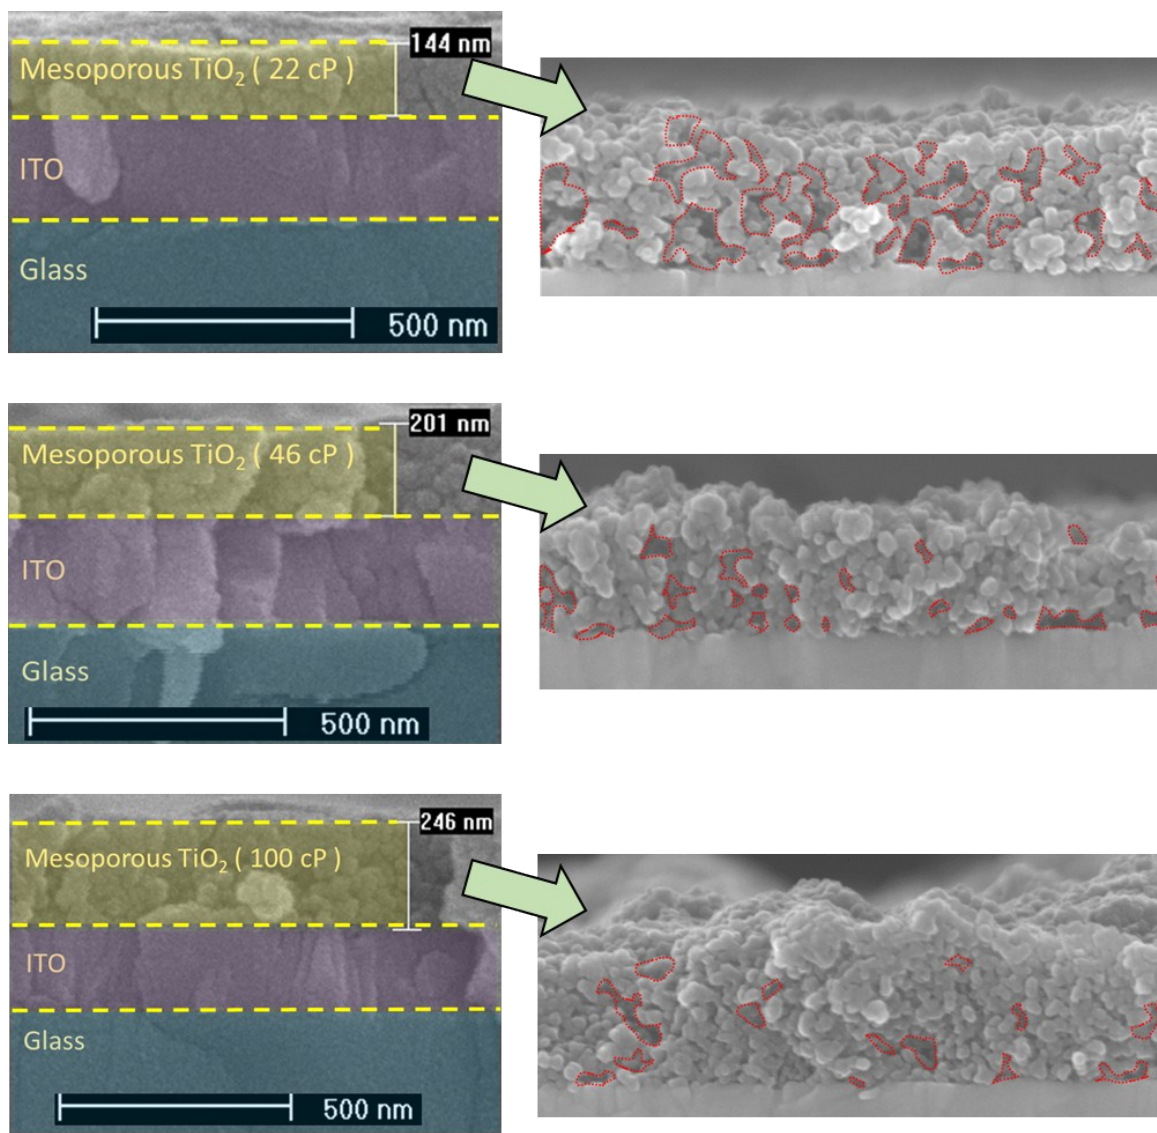

**Figure S3.** Side views and magnified images of 22 cP, 46 cP and 100 cP mesoporous TiO<sub>2</sub> film using SEM (Inset value: thickness of each film, Red box: pore in the films).

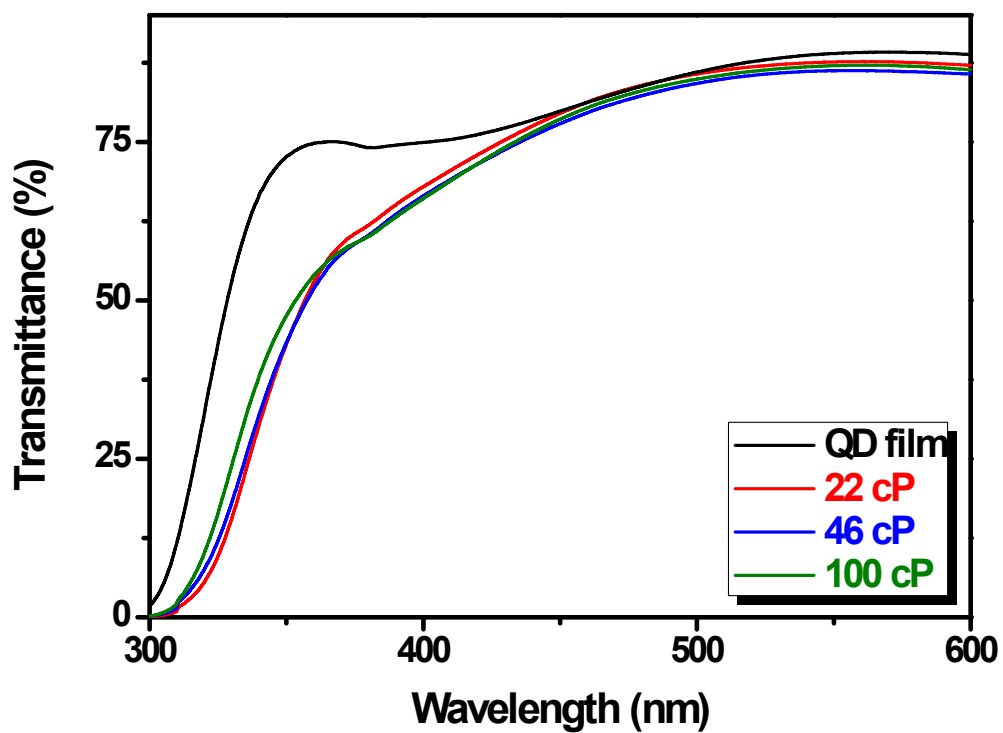

**Figure S4.** Optical transmittance spectra for CdZnS/ZnS QD-TiO<sub>2</sub> films (22 cP, 46 cP and 100 cP) and ITO glass as a reference sample.

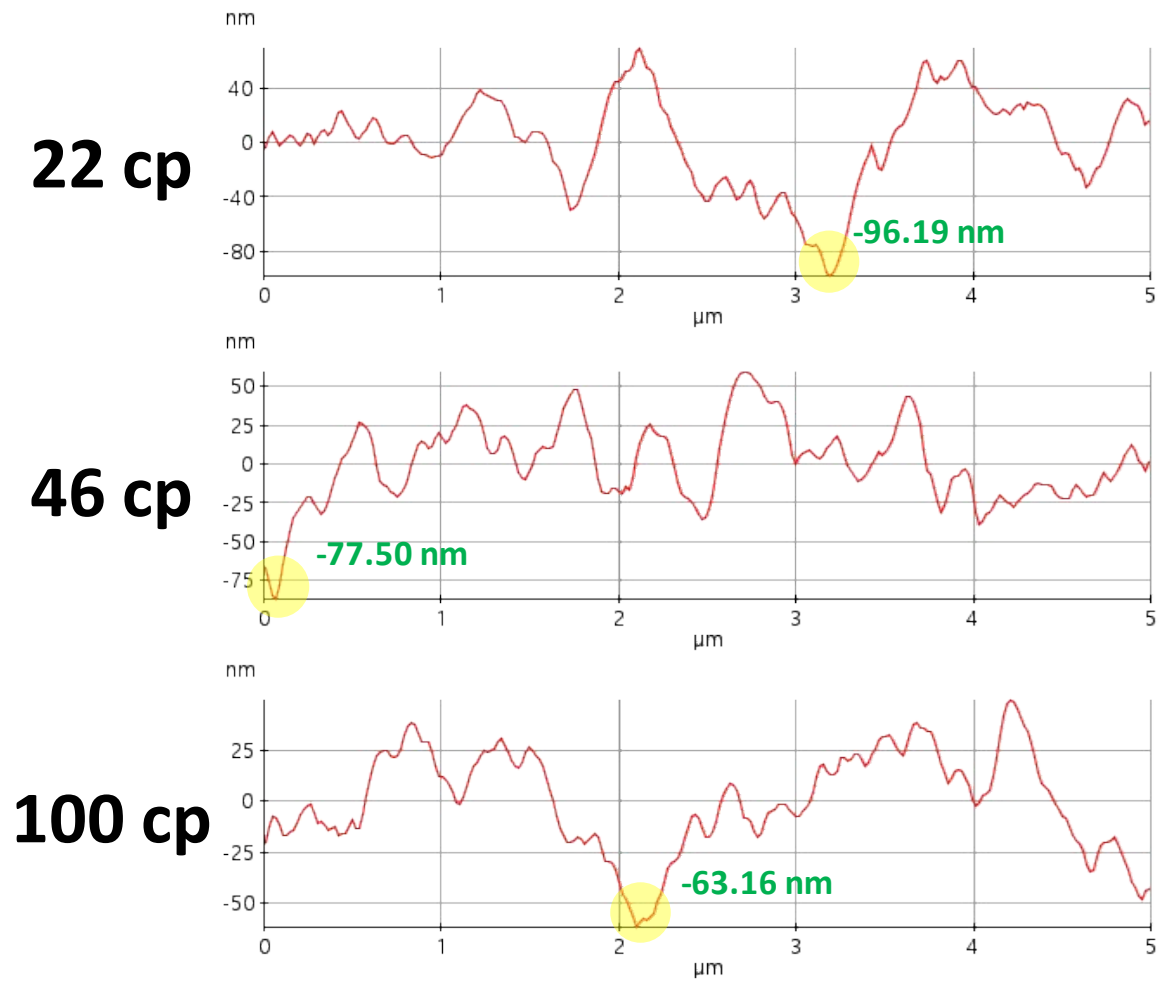

**Figure S5.** AFM line scan profile of 22 cP, 46 cP and 100 cP QD-TiO<sub>2</sub> films. The inset value in each sample indicates its maximum depth.

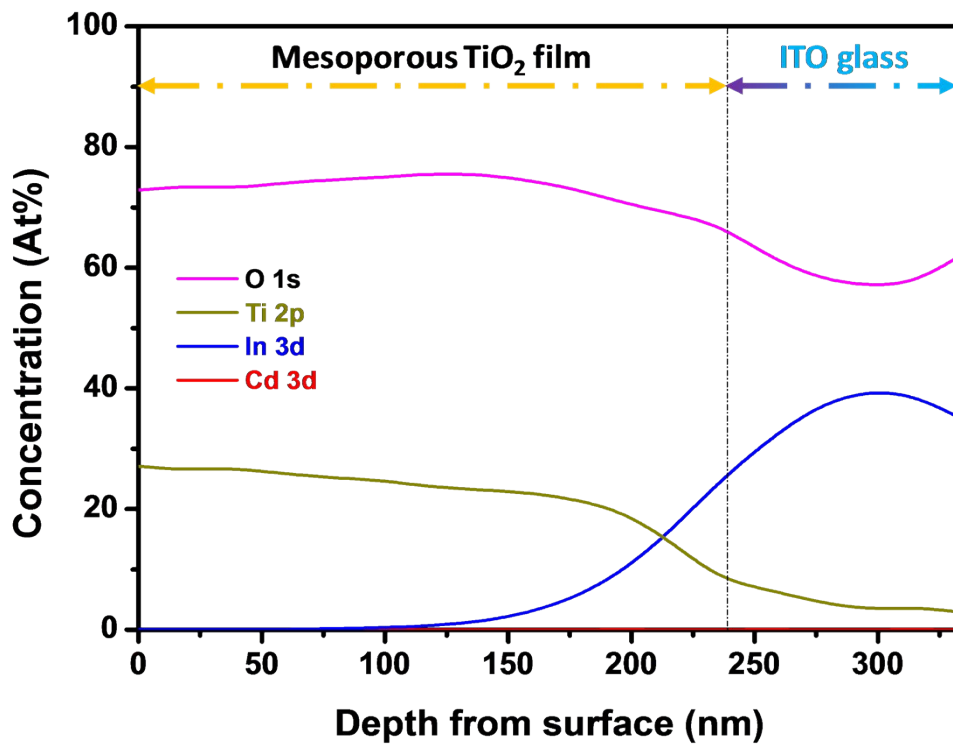

**Figure S6.** XPS depth profile of mesoporous TiO<sub>2</sub> film without CdZnS/ZnS QDs (dotted line distinguishes the mesoporous TiO<sub>2</sub> film from ITO glass).



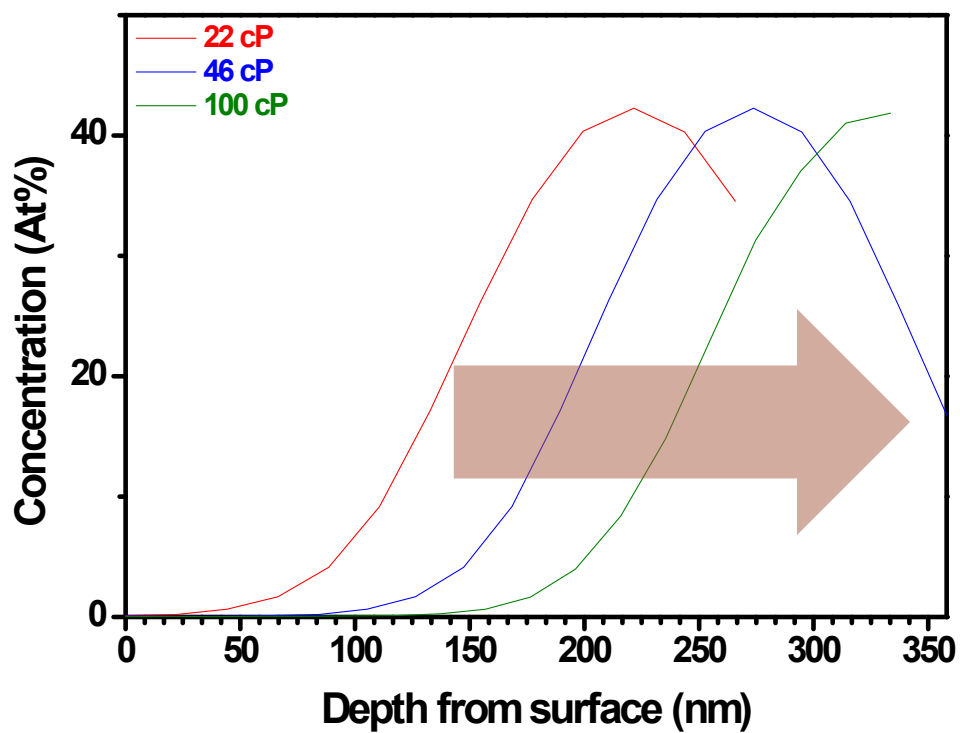

**Figure S7.** Shift of In 3d peaks from XPS depth profile depending on the viscosity of CdZnS/ZnS QD-TiO<sub>2</sub> film.

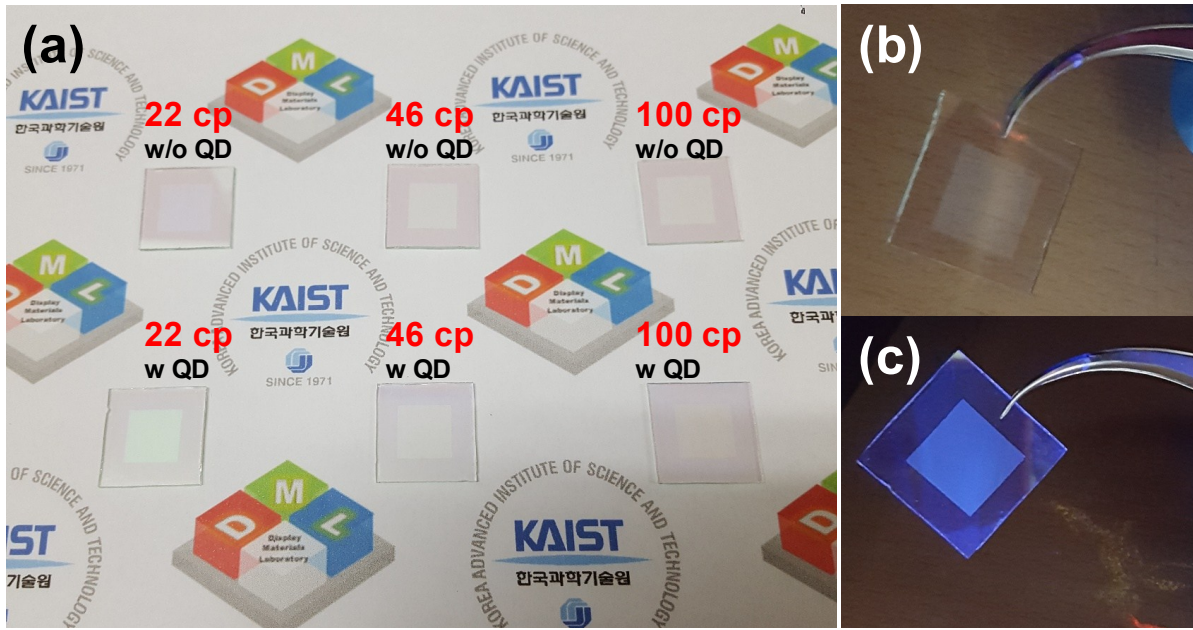

**Figure S8.** (a) Photographs of mesoporous TiO<sub>2</sub> films before and after dipping (b) CdZnS/ZnS QD-TiO<sub>2</sub> film without UV light excitation (c) QD-TiO<sub>2</sub> film emitting blue light by UV light excitation (excitation wavelength : 375 nm).

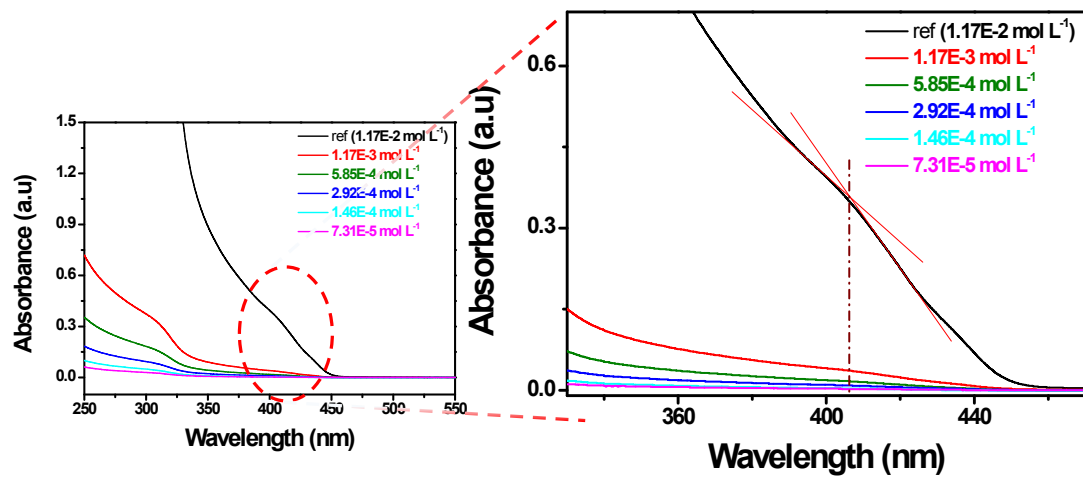

**Figure S9.** (left) Plot of absorbance versus wavelength using UV-visible spectroscopy from various concentration of CdZnS/ZnS QDs in solution. (right) Magnified plot from the left one to indicate the absorption peak of QDs.

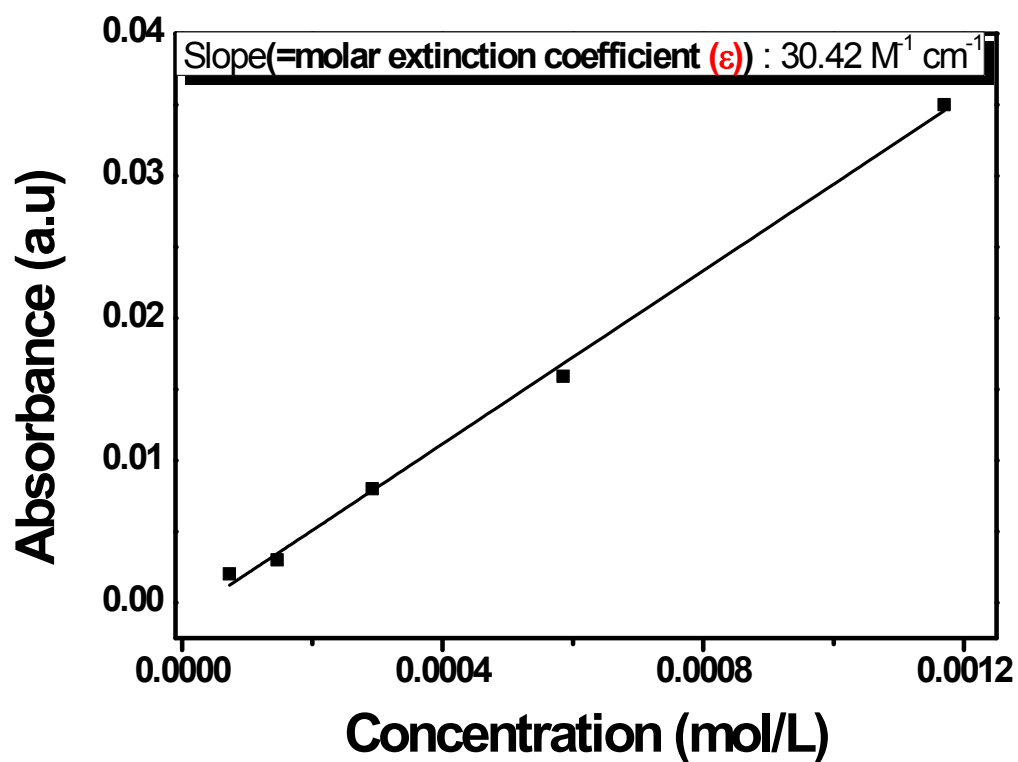

**Figure S10.** Plot of the absorbance versus concentration of CdZnS/ZnS QD solutions from Figure S10 to obtain molar extinction coefficient. The slope of this plot is molar extinction coefficient of QDs.
